# Supplementary material for: What to see when you are looking at confusion: a review of the neuroimaging of acute encephalopathy
Source: HighWire-hosted journal article supplement (doi:10.1136/jnnp-2014-308216), 2014-08-04
Supplement: jnnp-2014-308216supp_table1.pdf [file jnnp-2014-308216supp_table1.pdf]

**Supplementary Table 1. Neuroimaging findings in hypoxic-ischemic encephalopathy**

| References                             | Total no. of patients     | Imaging technique                                                              | Neuroimaging findings                                                                                                                                                                             | Predictive value for poor outcome                                                                                                                                      |
|----------------------------------------|---------------------------|--------------------------------------------------------------------------------|---------------------------------------------------------------------------------------------------------------------------------------------------------------------------------------------------|------------------------------------------------------------------------------------------------------------------------------------------------------------------------|
| <b>Hypoxic-ischemic encephalopathy</b> |                           |                                                                                |                                                                                                                                                                                                   |                                                                                                                                                                        |
| <b>CT</b>                              | 69 patients               |                                                                                |                                                                                                                                                                                                   |                                                                                                                                                                        |
| 1 prospective study [1]                | 53 patients<br>out of 103 | CT at a median 1 days<br>after CPR and<br>hypothermia                          | Global cerebral edema                                                                                                                                                                             | False-positive rate 0% for death                                                                                                                                       |
| 1 case series [2]                      | 16 patients               | CT within 1 h after CPR                                                        | Putaminal, cortical and corticomedullary<br>contrast                                                                                                                                              | Higher putaminal, cortical and<br>corticomedullary contrast was<br>associated with CPC 4-5                                                                             |
| <b>MRI</b>                             | 269 patients              |                                                                                |                                                                                                                                                                                                   |                                                                                                                                                                        |
| 1 prospective study [3]                | 27 patients               | MRI in the first 15 days after<br>CPR                                          | Diffuse signal abnormalities in the cortex and<br>subcortical areas or effacement of the sulci                                                                                                    | All 8 patients with these MRI<br>findings died; 1 of 2 patients who<br>survived had subcortical signs of<br>ischemia                                                   |
| 1 retrospective study [4]              | 80 patients               | MRI in first 7 days after<br>CPR and hypothermia                               | Lower whole brain and regional median ADC                                                                                                                                                         | Patients with mRS >3 had<br>significant lower median whole<br>brain and regional ADC                                                                                   |
| 1 prospective study [5]                | 22 patients               | MRI at a median 4.1 (good<br>outcome) and 9.8 days<br>(poor outcome) after CPR | DWI and FLAIR multilobar, or diffuse lesion<br>pattern with cortical involvement                                                                                                                  | False-positive rate 0% for CPC<br>4-5                                                                                                                                  |
| 1 prospective study [6]                | 40 patients<br>out of 83  | MRI in the first 7 days after<br>CPR with hypothermia                          | ADC <650x10 <sup>6</sup> mm <sup>2</sup> /sec                                                                                                                                                     | False-positive rate 0% for death                                                                                                                                       |
| 1 prospective study [7]                | 22 patients<br>out of 111 | MRI at 48 hours after CPR<br>with hypothermia                                  | DWI with global ischemia or focal ischemia<br>with total lesion volume >20mL                                                                                                                      | False positive rate 0% for CPC<br>3-5                                                                                                                                  |
| 1 prospective study [8]                | 39 patients               | MRI in the first 5 days after<br>CPR with hypothermia                          | Cortical and/or deep grey nuclei lesions                                                                                                                                                          | False positive rate 23% for GOS<br>1-3                                                                                                                                 |
| 1 retrospective study [9]              | 39 patients               | MRI 1 to 150 days after<br>CPR                                                 | T2 and DWI changes in the cerebral cortex<br>and the deep grey matter                                                                                                                             | False positive rate 0% for Death,<br>profound cognitive impairment<br>including persistent vegetative<br>state, minimally area states or<br>severe physical impairment |
| <b>PET</b>                             | 17 patients               |                                                                                |                                                                                                                                                                                                   |                                                                                                                                                                        |
| 1 case series [10]                     | 17 patients               | Patients with vegetative<br>states (time after CPR not<br>provided)            | Hypometabolism frontal, parietal including<br>the precuneus, in the posterior cingulate<br>gyrus, and in the occipital areas.<br><br>Hypermetabolism in the insulas, cerebellum,<br>and brainstem | No clear evidence                                                                                                                                                      |

CT = computed tomography; MRI = magnetic resonance imaging; PET = positron emission tomography; CPR = cardiopulmonary resuscitation; ADC = apparent diffusion coefficient; DWI = diffusion-weighted imaging; FLAIR = fluid attenuated inversion recovery; mRS =

modified ranking scale; CPC = cerebral performance category; GOS = Glasgow outcome scale

## References

1. Fugate JE, Wijdicks EF, Mandrekar J, et al. Predictors of neurologic outcome in hypothermia after cardiac arrest. *Ann Neurol* 2010;68(6):907-914.
2. Yanagawa Y, Un-no Y, Sakamoto T, et al. Cerebral density on CT immediately after a successful resuscitation of cardiopulmonary arrest correlates with outcome. *Resuscitation* 2005;64(1):97-101.
3. Wijdicks EF, Campeau NG, Miller GM. MR imaging in comatose survivors of cardiac resuscitation. *AJNR Am J Neuroradiol* 2001;22(8):1561-1565.
4. Wu O, Sorensen AG, Benner T, et al. Comatose patients with cardiac arrest: predicting clinical outcome with diffusion-weighted MR imaging. *Radiology* 2009;252(1):173-181.
5. Topcuoglu MA, Oguz KK, Buyukserbetci G, et al. Prognostic value of magnetic resonance imaging in post-resuscitation encephalopathy. *Intern Med* 2009;48(18):1635-1645.
6. Wijman CA, Mlynash M, Caulfield AF, et al. Prognostic value of brain diffusion-weighted imaging after cardiac arrest. *Ann Neurol* 2009;65(4):394-402.
7. Choi SP, Park KN, Park HK, et al. Diffusion-weighted magnetic resonance imaging for predicting the clinical outcome of comatose survivors after cardiac arrest: a cohort study. *Crit Care* 2010;14(1):R17.
8. Cronberg T, Rundgren M, Westhall E, et al. Neuron-specific enolase correlates with other prognostic markers after cardiac arrest. *Neurology* 2011;77(7):623-630.
9. Howard RS, Holmes PA, Siddiqui A, et al. Hypoxic-ischaemic brain injury: imaging and neurophysiology abnormalities related to outcome. *QJM* 2012;105(6):551-561.
10. Kim YW, Kim HS, An YS. Brain metabolism in patients with vegetative state after post-resuscitated hypoxic-ischemic brain injury: statistical parametric mapping analysis of F-18 fluorodeoxyglucose positron emission tomography. *Chin Med J (Engl)* 2013;126(5):888-894.
