# Supplementary material for: What to see when you are looking at confusion: a review of the neuroimaging of acute encephalopathy
Source: HighWire-hosted journal article supplement (doi:10.1136/jnnp-2014-308216), 2014-08-04
Supplement: jnnp-2014-308216supp_table2.pdf [file jnnp-2014-308216supp_table2.pdf]

**Supplementary Table 2. Neuroimaging findings in encephalopathies with specific biochemical derangements**

| Imaging techniques / References                                                                       | Total no. of patients | Neuroimaging findings                                                                                                                                                                                                                                                                                              | Predictive value for poor outcome                                        |
|-------------------------------------------------------------------------------------------------------|-----------------------|--------------------------------------------------------------------------------------------------------------------------------------------------------------------------------------------------------------------------------------------------------------------------------------------------------------------|--------------------------------------------------------------------------|
| <b>Uremic encephalopathy</b>                                                                          |                       |                                                                                                                                                                                                                                                                                                                    |                                                                          |
| <b>CT</b><br>2 case series [1,2]<br>2 case reports [3,4]                                              | 7 patients            | Hypodense basal ganglia and capsules                                                                                                                                                                                                                                                                               | No clear evidence                                                        |
| <b>MRI</b><br>3 case series [1,2,5]<br>6 case reports [3,4,6-9]                                       | 15 patients           | - T2, FLAIR and DWI hyperintense basal ganglia, capsules and inconsistently in cortical areas<br>- Additional involvement of white matter and cerebral peduncles, occipital lobes and thalami                                                                                                                      | No clear evidence                                                        |
| <b>MRS</b><br>1 case report [10]                                                                      | 1 patient             | Decrease of N-acetyl-aspartate and the presence of lactate                                                                                                                                                                                                                                                         | No clear evidence                                                        |
| <b>PET</b><br>1 case series [11]                                                                      | 2 patients            | Decreased glucose metabolism in basal ganglia                                                                                                                                                                                                                                                                      | No clear evidence                                                        |
| <b>Hyperammonemic encephalopathy</b>                                                                  |                       |                                                                                                                                                                                                                                                                                                                    |                                                                          |
| <b>MRI</b><br>2 case series [12,13]                                                                   | 7 patients            | T2, FLAIR and DWI hyperintense cortical areas of the insula and the cingulum                                                                                                                                                                                                                                       | No clear evidence                                                        |
| <b>MRS</b><br>2 case reports [14,15]                                                                  | 2 patients            | Increased glutamine and glutamate; low myoinositol and choline                                                                                                                                                                                                                                                     | No clear evidence                                                        |
| <b>Hypo-/hypernatremic encephalopathies (pontine or extrapontine myelinolysis)</b>                    |                       |                                                                                                                                                                                                                                                                                                                    |                                                                          |
| <b>CT</b><br>2 retrospective studies [16,17]<br>1 Case series [18]                                    | 48 patients           | Normal in a few patients and hypodense pontine lesions in the others                                                                                                                                                                                                                                               | No clear evidence                                                        |
| <b>MRI</b><br>2 retrospective studies [16,17]<br>6 case series [18-23]<br>9 case reports [4,15,24-30] | 136 patients          | - T2, FLAIR and DWI hyperintense lesions of the pons. Less frequent lesions of the thalamus, midbrain, cortical gray matter, hippocampus, caudate, putamen, and middle cerebral peduncle<br>- In 1 patient T2 hyperintensities characteristically were distributed along the crowns and sides of the cerebral gyri | No correlation between the lesion size and outcome                       |
| <b>SPECT</b><br>2 case reports [31,32]                                                                | 2 patients            | Decreased striatal dopamine transporter binding and pontine hyperperfusion during recovery from pontine myelinolysis                                                                                                                                                                                               | No clear evidence                                                        |
| <b>Hypoglycemic encephalopathy</b>                                                                    |                       |                                                                                                                                                                                                                                                                                                                    |                                                                          |
| <b>CT</b><br>1 case series [33]<br>1 case report [4]                                                  | 5 patients            | Enhancing, hypodense basal ganglia, cerebral cortex, hippocampus, and substantia nigra                                                                                                                                                                                                                             | No clear evidence                                                        |
| <b>MRI</b><br>5 case series [33-37]<br>8 case reports [4,38-44]                                       | 41 patients           | - T2 and FLAIR hyperintensities in the caudate, lenticular nuclei, cerebral cortex, substantia nigra, hippocampus, and internal capsules<br>- In few patients DWI hyperintense white and deep gray matter and splenium of the corpus callosum                                                                      | Associated with vegetative state or severe disability in two case series |
| <b>Hyperglycemic encephalopathy</b>                                                                   |                       |                                                                                                                                                                                                                                                                                                                    |                                                                          |
| <b>CT</b><br>2 case reports [45,46]<br>1 case series [47]                                             | 11 patients           | Hyperdense putamen and/or caudate nucleus or, in fewer patients, normal CT                                                                                                                                                                                                                                         | No clear evidence                                                        |
| <b>MRI</b><br>5 case series [47-51]<br>3 case reports [45,46,52]                                      | 31 patients           | Uni- or bilateral T1 hyperintensities in the striatum (mostly the putamen)                                                                                                                                                                                                                                         | No clear evidence                                                        |
| <b>SPECT</b><br>1 case series [47]                                                                    | 3 patients            | Hypoperfusion of the basal ganglia                                                                                                                                                                                                                                                                                 | No clear evidence                                                        |

CT = computed tomography; MRI = magnetic resonance imaging; DWI = diffusion-weighted imaging; FLAIR = fluid attenuated inversion recovery; MRS = magnetic resonance spectroscopy; PET = positron emission tomography; SPECT = single photon emission computed tomography

## References

1. Wang HC, Brown P, Lees AJ. Acute movement disorders with bilateral basal ganglia lesions in uremia. *Mov Disord* 1998;13(6):952-957.
2. Lee EJ, Park JH, Ihn Y, et al. Acute bilateral basal ganglia lesions in diabetic uraemia: diffusion-weighted MRI. *Neuroradiology* 2007;49(12):1009-1013.
3. Sheu YL, Cheng SJ, Chen YM, et al. The syndrome of bilateral basal ganglia lesions in diabetic uremic patients presenting with a relapsing and remitting course: a case report. *Acta Neurol Taiwan* 2007;16(4):226-230.
4. Bathla G, Hegde AN. MRI and CT appearances in metabolic encephalopathies due to systemic diseases in adults. *Clin Radiol* 2012: epub ahead of print.
5. Lin JJ. Generalized chorea in the syndrome of acute bilateral basal ganglia lesions in patients with diabetic uremia. *J Clin Neurosci* 2011;18(9):1266-1268.
6. Park JH, Kim HJ, Kim SM. Acute chorea with bilateral basal ganglia lesions in diabetic uremia. *Can J Neurol Sci* 2007;34(2):248-250.
7. Pruss H, Siebert E, Masuhr F. Reversible cytotoxic brain edema and facial weakness in uremic encephalopathy. *J Neurol* 2009;256(8):1372-1373.
8. Schmidt M, Sitter T, Lederer SR, et al. Reversible MRI changes in a patient with uremic encephalopathy. *J Nephrol* 2001;14(5):424-427.
9. Kang E, Jeon SJ, Choi SS. Uremic encephalopathy with atypical magnetic resonance features on diffusion-weighted images. *Korean J Radiol* 2012;13(6):808-811.
10. Dicuonzo F, Di Fede R, Salvati A, et al. Acute extrapyramidal disorder with bilateral reversible basal ganglia lesions in a diabetic uremic patient: diffusion-weighted imaging and spectroscopy findings. *J Neurol Sci* 2010;293(1-2):119-121.
11. Wang HC, Hsu JL, Shen YY. Acute bilateral basal ganglia lesions in patients with diabetic uremia: an FDG-PET study. *Clin Nucl Med* 2004;29(8):475-478.
12. Takanashi J, Barkovich AJ, Cheng SF, et al. Brain MR imaging in acute hyperammonemic encephalopathy arising from late-onset ornithine transcarbamylase deficiency. *AJNR Am J Neuroradiol* 2003;24(3):390-393.
13. U King-Im J, Yu E, Bartlett E, et al. Acute hyperammonemic encephalopathy in adults: imaging findings. *AJNR Am J Neuroradiol* 2011;32(2):413-418.
14. Rovira A, Alonso J, Cordoba J. MR imaging findings in hepatic encephalopathy. *AJNR Am J Neuroradiol* 2008;29(9):1612-1621.
15. Sharma P, Eesa M, Scott JN. Toxic and acquired metabolic encephalopathies: MRI appearance. *AJR Am J Roentgenol* 2009;193(3):879-886.
16. Menger H, Jorg J. Outcome of central pontine and extrapontine myelinolysis (n = 44). *J Neurol* 1999;246(8):700-705.
17. Graff-Radford J, Fugate JE, Kaufmann TJ, et al. Clinical and radiologic correlations of central pontine myelinolysis syndrome. *Mayo Clin Proc* 2011;86(11):1063-1067.
18. Miller GM, Baker HL, Jr., Okazaki H, et al. Central pontine myelinolysis and its imitators: MR findings. *Radiology* 1988;168(3):795-802.

19. Karp BI, Laureno R. Pontine and extrapontine myelinolysis: a neurologic disorder following rapid correction of hyponatremia. *Medicine (Baltimore)* 1993;72(6):359-373.
20. Brunner JE, Redmond JM, Hagggar AM, et al. Central pontine myelinolysis and pontine lesions after rapid correction of hyponatremia: a prospective magnetic resonance imaging study. *Ann Neurol* 1990;27(1):61-66.
21. Yuh WT, Simonson TM, D'Alessandro MP, et al. Temporal changes of MR findings in central pontine myelinolysis. *AJNR Am J Neuroradiol* 1995;16(4 Suppl):975-977.
22. Forster A, Nolte I, Wenz H, et al. Value of diffusion-weighted imaging in central pontine and extrapontine myelinolysis. *Neuroradiology* 2012.
23. De Souza A, Desai PK. More often striatal myelinolysis than pontine? A consecutive series of patients with osmotic demyelination syndrome. *Neurol Res* 2012;34(3):262-271.
24. Chu K, Kang DW, Ko SB, et al. Diffusion-weighted MR findings of central pontine and extrapontine myelinolysis. *Acta Neurol Scand* 2001;104(6):385-388.
25. Ruzek KA, Campeau NG, Miller GM. Early diagnosis of central pontine myelinolysis with diffusion-weighted imaging. *AJNR Am J Neuroradiol* 2004;25(2):210-213.
26. Fleming JD, Babu S. Images in clinical medicine. Central pontine myelinolysis. *N Engl J Med* 2008;359(23):e29.
27. Gujjar A, Al-Mamari A, Jacob PC, et al. Extrapontine myelinolysis as presenting manifestation of adrenal failure: a case report. *J Neurol Sci* 2010;290(1-2):169-171.
28. Pietrini V, Mozzani F, Crafa P, et al. Central pontine and extrapontine myelinolysis despite careful correction of hyponatremia: clinical and neuropathological findings of a case. *Neurol Sci* 2010;31(2):227-230.
29. Rizvi I, Ahmad M, Gupta A, et al. Isolated extra pontine myelinolysis presenting as acute onset parkinsonism. *BMJ Case Rep* 2012;2012.
30. Juergenson I, Zappini F, Fiaschi A, et al. Teaching neuroimages: neuroradiologic findings in pontine and extrapontine myelinolysis: clue for the pathogenesis? *Neurology* 2012;78(1):e1-2.
31. Kim JS, Lee KS, Han SR, et al. Decreased striatal dopamine transporter binding in a patient with extrapontine myelinolysis. *Mov Disord* 2003;18(3):342-345.
32. Nishida Y, Ichikawa T. Pontine hyperperfusion during recovery from central pontine myelinolysis. *Intern Med* 2012;51(7):817-818.
33. Fujioka M, Okuchi K, Hiramatsu KI, et al. Specific changes in human brain after hypoglycemic injury. *Stroke* 1997;28(3):584-587.
34. Lo L, Tan AC, Umapathi T, et al. Diffusion-weighted MR imaging in early diagnosis and prognosis of hypoglycemia. *AJNR Am J Neuroradiol* 2006;27(6):1222-1224.
35. Kim JH, Choi JY, Koh SB, et al. Reversible splenial abnormality in hypoglycemic encephalopathy. *Neuroradiology* 2007;49(3):217-222.
36. Ma JH, Kim YJ, Yoo WJ, et al. MR imaging of hypoglycemic encephalopathy: lesion distribution and prognosis prediction by diffusion-weighted imaging. *Neuroradiology* 2009;51(10):641-649.
37. Lim CC, Gan R, Chan CL, et al. Severe hypoglycemia associated with an illegal sexual enhancement product adulterated with glibenclamide: MR imaging findings. *Radiology* 2009;250(1):193-201.
38. Finelli PF. Diffusion-weighted MR in hypoglycemic coma. *Neurology* 2001;57(5):933.
39. Aoki T, Sato T, Hasegawa K, et al. Reversible hyperintensity lesion on diffusion-weighted MRI in hypoglycemic coma. *Neurology* 2004;63(2):392-393.

40. Bottcher J, Kunze A, Kurrat C, et al. Localized reversible reduction of apparent diffusion coefficient in transient hypoglycemia-induced hemiparesis. *Stroke* 2005;36(3):e20-22.
41. Cordonnier C, Oppenheim C, Lamy C, et al. Serial diffusion and perfusion-weighted MR in transient hypoglycemia. *Neurology* 2005;65(1):175.
42. Albayram S, Ozer H, Gokdemir S, et al. Reversible reduction of apparent diffusion coefficient values in bilateral internal capsules in transient hypoglycemia-induced hemiparesis. *AJNR Am J Neuroradiol* 2006;27(8):1760-1762.
43. Maruya J, Endoh H, Watanabe H, et al. Rapid improvement of diffusion-weighted imaging abnormalities after glucose infusion in hypoglycaemic coma. *J Neurol Neurosurg Psychiatry* 2007;78(1):102-103.
44. Terakawa Y, Tsuyuguchi N, Nunomura K, et al. Reversible diffusion-weighted imaging changes in the splenium of the corpus callosum and internal capsule associated with hypoglycemia - case report. *Neurol Med Chir (Tokyo)* 2007;47(10):486-488.
45. Nakagawa T, Mitani K, Nagura H, et al. [Chorea-ballism associated with nonketotic hyperglycemia and presenting with bilateral hyperintensity of the putamen on MR T1-weighted images--a case report]. *Rinsho Shinkeigaku* 1994;34(1):52-55.
46. Nagai C, Kato T, Katagiri T, et al. Hyperintense putamen on T1-weighted MR images in a case of chorea with hyperglycemia. *AJNR Am J Neuroradiol* 1995;16(6):1243-1246.
47. Lai PH, Tien RD, Chang MH, et al. Chorea-ballismus with nonketotic hyperglycemia in primary diabetes mellitus. *AJNR Am J Neuroradiol* 1996;17(6):1057-1064.
48. Yahikozawa H, Hanyu N, Yamamoto K, et al. Hemiballism with striatal hyperintensity on T1-weighted MRI in diabetic patients: a unique syndrome. *J Neurol Sci* 1994;124(2):208-214.
49. Lee BC, Hwang SH, Chang GY. Hemiballismus-hemichorea in older diabetic women: a clinical syndrome with MRI correlation. *Neurology* 1999;52(3):646-648.
50. Lin JJ, Lin GY, Shih C, et al. Presentation of striatal hyperintensity on T1-weighted MRI in patients with hemiballism-hemichorea caused by non-ketotic hyperglycemia: report of seven new cases and a review of literature. *J Neurol* 2001;248(9):750-755.
51. Lee EJ, Choi JY, Lee SH, et al. Hemichorea-hemiballism in primary diabetic patients: MR correlation. *J Comput Assist Tomogr* 2002;26(6):905-911.
52. Ohara S, Nakagawa S, Tabata K, et al. Hemiballism with hyperglycemia and striatal T1-MRI hyperintensity: an autopsy report. *Mov Disord* 2001;16(3):521-525.
