# Supplementary material for: What to see when you are looking at confusion: a review of the neuroimaging of acute encephalopathy
Source: HighWire-hosted journal article supplement (doi:10.1136/jnnp-2014-308216), 2014-08-04
Supplement: jnnp-2014-308216supp_table3.pdf [file jnnp-2014-308216supp_table3.pdf]

**Supplementary Table 3. Neuroimaging findings in specific clinical encephalopathy syndromes**

| Imaging techniques / References                                                                                                       | Total no. of patients | Neuroimaging findings                                                                                                                                                                                                                                                                                                                                                                                                                                                                                                                                                                                                                                                                                 | Predictive value for poor outcome                                                                                                                                          |
|---------------------------------------------------------------------------------------------------------------------------------------|-----------------------|-------------------------------------------------------------------------------------------------------------------------------------------------------------------------------------------------------------------------------------------------------------------------------------------------------------------------------------------------------------------------------------------------------------------------------------------------------------------------------------------------------------------------------------------------------------------------------------------------------------------------------------------------------------------------------------------------------|----------------------------------------------------------------------------------------------------------------------------------------------------------------------------|
| <b>Hepatic encephalopathy</b>                                                                                                         |                       |                                                                                                                                                                                                                                                                                                                                                                                                                                                                                                                                                                                                                                                                                                       |                                                                                                                                                                            |
| <b>CT</b><br>1 case series [1]                                                                                                        | 17 patients           | Normal                                                                                                                                                                                                                                                                                                                                                                                                                                                                                                                                                                                                                                                                                                | No clear evidence                                                                                                                                                          |
| <b>MRI</b><br>1 prospective study [2]<br>4 retrospective studies [3-6]<br>5 case series [1,7-10]<br>1 case report [11]                | 290 patients          | - T1 hyperintensities in the globus pallidus and, less frequent, in the substantia nigra and the midbrain tegmentum<br>- FLAIR and DWI hyperintense thalami, posterior limbs of the internal capsule, periventricular region, dorsal brain stem, and diffuse cortical involvement in 1 study of 20 patients<br>- Connectivity: decreased in the caudate of the anterior/middle cingulate gyrus; increased in the caudate of the left motor cortex; reduced between the putamen and the anterior cingulate gyrus, right insular lobe, inferior frontal gyrus, left parahippocampal gyrus, and the anterior lobe of the right cerebellum; increased between the putamen and right middle temporal gyrus | Correlations between the cortico-striatal connectivity and neuropsychological performances, but not between the striatal connectivity and globus pallidus signal intensity |
| <b>MRS</b><br>2 case reports [10,12]                                                                                                  | 2 patients            | - Increased glutamate/glutamine ratio and low myoinositol and choline<br>- Diminished choline and elevated glutamate/glutamine ratio in the parietooccipital cortex                                                                                                                                                                                                                                                                                                                                                                                                                                                                                                                                   | No clear evidence                                                                                                                                                          |
| <b>SPECT</b><br>2 case reports [13,14]                                                                                                | 2 patients            | - High blood flow in the cerebellum, basal ganglia and cerebral cortex<br>- Alteration of striatal D2-receptor binding and dopamine re-uptake                                                                                                                                                                                                                                                                                                                                                                                                                                                                                                                                                         | No clear evidence                                                                                                                                                          |
| <b>PET</b><br>1 prospective study [15]<br>1 case report [16]                                                                          | 41 patients           | - Hypoperfusion of the superior and middle frontal gyri, and inferior parietal lobules<br>- Increased expression of peripheral benzodiazepine binding sites prefrontal and striatal in cirrhotic patients                                                                                                                                                                                                                                                                                                                                                                                                                                                                                             | No clear evidence                                                                                                                                                          |
| <b>Wernicke's encephalopathy</b>                                                                                                      |                       |                                                                                                                                                                                                                                                                                                                                                                                                                                                                                                                                                                                                                                                                                                       |                                                                                                                                                                            |
| <b>CT</b><br>1 retrospective study [17]<br>1 case series [18]<br>4 case reports [19-22]                                               | 22 patients           | Hypodense paraventricular thalamic regions with or without contrast enhancement and, less frequent, hypodense periaqueductal regions, tectum of the midbrain, and tegmentum of the pons                                                                                                                                                                                                                                                                                                                                                                                                                                                                                                               | No clear evidence                                                                                                                                                          |
| <b>MRI</b><br>1 prospective study [23]<br>4 retrospective studies [17,24-26]<br>2 case series [18,27]<br>5 case reports [21,22,28-30] | 202 patients          | - T2 and FLAIR hyperintense periaqueduct and medial thalamic regions. Less frequent hyperintense mamillary bodies, periaqueductal region, hypothalamus, tectum, and cerebellum<br>- In 1 study 78% of patients with Wernicke's encephalopathy had smaller mamillary bodies than controls<br>- Contrast-enhanced mamillary bodies were related to alcohol abuse<br>- Atrophic mamillary bodies and cerebellar vermis (chronic phase)                                                                                                                                                                                                                                                                   | No clear evidence                                                                                                                                                          |
| <b>MRS</b><br>2 case reports [30,31]                                                                                                  | 2 patients            | Thalamic lactate increase and low N-acetyl-aspartate/creatine                                                                                                                                                                                                                                                                                                                                                                                                                                                                                                                                                                                                                                         | No clear evidence                                                                                                                                                          |
| <b>SPECT</b><br>1 case report [32]                                                                                                    | 1 patient             | Hypoperfusion fronto-parietal and in the right basal ganglia                                                                                                                                                                                                                                                                                                                                                                                                                                                                                                                                                                                                                                          | No clear evidence                                                                                                                                                          |
| <b>Posterior reversible encephalopathy</b>                                                                                            |                       |                                                                                                                                                                                                                                                                                                                                                                                                                                                                                                                                                                                                                                                                                                       |                                                                                                                                                                            |
| <b>CT</b><br>1 retrospective study [33]<br>2 case reports [34,35]                                                                     | 69 patients           | - Hypodensities in the parietooccipital subcortical white matter and cerebellum with increased cerebral blood volume, blood flow, and reduced time to peak mainly in the posterior vascular distribution (Features of PRES in 45%, unspecific in 33% and normal in 22%)<br>- In patients with PRES on MRI, CT was negative/unspecific in 66%                                                                                                                                                                                                                                                                                                                                                          | No clear evidence                                                                                                                                                          |
| <b>MRI</b><br>4 retrospective studies [33,36-38]<br>2 case series [39,40]                                                             | 355 patients          | - T2, FLAIR, and DWI hyperintensities in the posterior circulation areas and, less frequent, in the anterior circulation structures. ADC values in areas of abnormal T2 signal were high                                                                                                                                                                                                                                                                                                                                                                                                                                                                                                              | More extensive T2 signal abnormalities were seen with poor                                                                                                                 |

|                                                                                                                                                                                  |              |                                                                                                                                                                                                                                                                                                                                                                   |                                                                                  |
|----------------------------------------------------------------------------------------------------------------------------------------------------------------------------------|--------------|-------------------------------------------------------------------------------------------------------------------------------------------------------------------------------------------------------------------------------------------------------------------------------------------------------------------------------------------------------------------|----------------------------------------------------------------------------------|
| 7 case reports [11,34,41-45]                                                                                                                                                     |              | - Contrast-enhancement, restrictions on DWI and ADC                                                                                                                                                                                                                                                                                                               | outcome                                                                          |
| <b>MRS</b><br>2 case series [39,46]<br>1 case report [41]                                                                                                                        | 13 patients  | Decrease in N-acetyl-aspartate in patients with normal MRI or reversible MRI changes and only minimal elevation of choline                                                                                                                                                                                                                                        | No clear evidence                                                                |
| <b>Acute disseminated encephalomyelitis</b>                                                                                                                                      |              |                                                                                                                                                                                                                                                                                                                                                                   |                                                                                  |
| <b>CT</b><br>11 retrospective study [47]                                                                                                                                         | 12 patients  | Normal                                                                                                                                                                                                                                                                                                                                                            | No clear evidence                                                                |
| <b>MRI</b><br>2 retrospective studies [47,48]<br>1 prospective study [49]                                                                                                        | 50 patients  | - T2 and FLAIR with multiple brain lesions in the deep and subcortical white matter and in 1/3 in the brainstem and spinal cord with contrast enhancement<br>- In the first week (acute phase) DWI with restricted diffusion, and later (subacute phase) with increased diffusion                                                                                 | No clear evidence                                                                |
| <b>MRS</b><br>1 retrospective study [48]                                                                                                                                         | 8 patients   | Decreased N-acetyl-aspartate in regions corresponding to the T2 signal intensity in the subacute phase                                                                                                                                                                                                                                                            | No clear evidence                                                                |
| <b>Paraneoplastic limbic encephalitis</b>                                                                                                                                        |              |                                                                                                                                                                                                                                                                                                                                                                   |                                                                                  |
| <b>CT</b><br>5 case reports [50-54]                                                                                                                                              | 5 patients   | Normal                                                                                                                                                                                                                                                                                                                                                            | No clear evidence                                                                |
| <b>MRI</b><br>2 retrospective studies [55,56]<br>10 case reports [50-54,57-61]                                                                                                   | 83 patients  | - T2 and FLAIR hyperintensities with mesial temporal contrast enhancement in >50% and/or atrophy<br>- Subcortical regions, the cerebellum or brainstem may be involved                                                                                                                                                                                            | No clear evidence                                                                |
| <b>PET</b><br>4 case reports [50,58,62,63]                                                                                                                                       | 4 patients   | PET may reveal increased metabolism mesial temporal                                                                                                                                                                                                                                                                                                               | No clear evidence                                                                |
| <b>Autoimmune limbic encephalitis</b>                                                                                                                                            |              |                                                                                                                                                                                                                                                                                                                                                                   |                                                                                  |
| <b>CT</b><br>4 case reports [64-67]                                                                                                                                              | 4 patients   | Normal                                                                                                                                                                                                                                                                                                                                                            | No clear evidence                                                                |
| <b>MRI</b><br>NMDA<br>1 retrospective study [68]<br>1 case series [69]<br>9 case reports [65,66,70-76]<br>SREAT<br>4 retrospective studies [77-80]<br>10 case reports [67,81-87] | 158 patients | - In NMDAR-antibody mediated limbic encephalitis, MRI is mostly (50%) normal but can show T2 and FLAIR hyperintensities temporal and rarely extratemporal. MRI is used to exclude other causes of encephalopathy<br>- In SREAT, T2 and FLAIR can rarely resemble acute demyelinating encephalomyelitis or show hippocampal or multifocal hyperintensities         | No clear evidence                                                                |
| <b>MRS</b><br>2 case reports [82,88]                                                                                                                                             | 2 patients   | In SREAT, decreased N-acetyl-aspartate, myo-inositol peaks, elevations in lipid, lactate, glutamate/glutamine and choline peaks support inflammation                                                                                                                                                                                                              | No clear evidence                                                                |
| <b>SPECT</b><br>1 retrospective study [79]<br>4 case reports [89-92]                                                                                                             | 16 patients  | - In NMDAR-antibody mediated limbic encephalitis, abnormal multifocal cerebral blood flow<br>- In SREAT, decreased tracer uptake in the striatum and global cortical hypoperfusion                                                                                                                                                                                | No clear evidence                                                                |
| <b>Herpes simplex encephalitis</b>                                                                                                                                               |              |                                                                                                                                                                                                                                                                                                                                                                   |                                                                                  |
| <b>CT</b><br>3 retrospective studies [93-95]<br>1 case series [96]<br>2 case reports [97,98]                                                                                     | 121 patients | Usually normal, but can characteristically show reduced attenuation in the temporal lobes after the first week of the disease                                                                                                                                                                                                                                     | Lesions on CT are predictive of prolonged course of disease                      |
| <b>MRI</b><br>5 retrospective studies [95,99-102]<br>4 case series [96,103-105]<br>22 case reports [97,98,106-125]                                                               | 298 patients | - T2, FLAIR, and DWI hyperintensities in the medial temporal lobes, the orbital surface of the frontal lobes, the insular cortex, the angular gyrus, and in the insulas early in the course. Rarely the thalami and insulas may be involved.<br>- Abnormal areas may show enhancement with gadolinium<br>- Midline shift may be present with large cerebral edema | The extent of brain involvement is an independent risk factor for poor prognosis |
| <b>SPECT</b><br>1 case series [96]<br>1 case report [97]                                                                                                                         | 3 patients   | Increased tracer accumulation which reflects hyperperfusion possibly earlier than pathologic signals appear on MRI                                                                                                                                                                                                                                                | No clear evidence                                                                |
| <b>Susac's syndrome</b>                                                                                                                                                          |              |                                                                                                                                                                                                                                                                                                                                                                   |                                                                                  |

|                                                                                                               |               |                                                                                                                                                                                                                                                                                                                                                                                                                                                                                                                                                                                                                                                                                                                                   |                                                                                                                                                                              |
|---------------------------------------------------------------------------------------------------------------|---------------|-----------------------------------------------------------------------------------------------------------------------------------------------------------------------------------------------------------------------------------------------------------------------------------------------------------------------------------------------------------------------------------------------------------------------------------------------------------------------------------------------------------------------------------------------------------------------------------------------------------------------------------------------------------------------------------------------------------------------------------|------------------------------------------------------------------------------------------------------------------------------------------------------------------------------|
| <b>CT</b><br>1 case report [126]                                                                              | 1 patient     | Does not reveal any of the specific structural abnormalities, but can demonstrate foci of subtle low attenuation in the corpus callosum                                                                                                                                                                                                                                                                                                                                                                                                                                                                                                                                                                                           | No clear evidence                                                                                                                                                            |
| <b>MRI</b><br>4 case series [127-130]<br>12 case reports [126,131-141]                                        | 53 patients   | <ul style="list-style-type: none"> <li>- T2 and FLAIR hyperintensities in the corpus callosum, which is always involved</li> <li>- Any part of the corpus callosum can be involved, but predominately the central fibers are showing microinfarcts that are typically small but may sometimes be large</li> <li>- Foci in the corpus callosum may enhance following gadolinium administration and there can be restricted diffusion with corresponding low signal intensity on the ADC map</li> <li>- Spinal cord involvement is rare but exists</li> <li>- Subsequently, central callosal holes arise</li> </ul>                                                                                                                 | No clear evidence                                                                                                                                                            |
| <b>PET</b><br>1 case report [142]                                                                             | 1 patient     | Marked hypometabolism in the frontal, parietal and temporal lobes – an unspecific pattern that can be mistaken as ADEM                                                                                                                                                                                                                                                                                                                                                                                                                                                                                                                                                                                                            | No clear evidence                                                                                                                                                            |
| <b>Creutzfeldt-Jakob disease</b>                                                                              |               |                                                                                                                                                                                                                                                                                                                                                                                                                                                                                                                                                                                                                                                                                                                                   |                                                                                                                                                                              |
| <b>CT</b><br>3 case series [143-145]                                                                          | 11 patients   | Non-specific generalized cortical and subcortical atrophy in the later phases of disease                                                                                                                                                                                                                                                                                                                                                                                                                                                                                                                                                                                                                                          | No clear evidence                                                                                                                                                            |
| <b>MRI</b><br>13 retrospective studies [146-158]<br>12 case series [144,159-169]<br>26 case reports [170-197] | 3393 patients | <ul style="list-style-type: none"> <li>- T2 and FLAIR hyperintensities in the cerebral cortex and lesions in the putamen and caudate head isointense to cortex</li> <li>- Less frequently, hyperintensity can be detected in the globus pallidus, thalamus, the deep white matter, and the cerebral and cerebellar cortex. Laminar lesions may be observed in the cerebral cortex and cerebellum</li> <li>- DWI is most sensitive in early stages uncovering the altered diffusion in the regions mentioned above</li> <li>- In vCJD symmetrical hyperintensities of the pulvinar thalami (relative to the cortex and especially the anterior part of the putamen) are characteristic and known as the “pulvinar sign”</li> </ul> | Patients with cortical plus basal ganglia hyperintensity have shorter interval from symptom onset to akinetic mutism than those with isolated cortical ribbon hyperintensity |
| <b>MRS</b><br>1 case report [198]                                                                             | 1 patients    | Decreased N-acetyl-aspartate and slightly increased levels of myoinositol in the striatum and the insular cortex.                                                                                                                                                                                                                                                                                                                                                                                                                                                                                                                                                                                                                 | No clear evidence                                                                                                                                                            |
| <b>SPECT</b><br>1 case report [172]                                                                           | 1 patient     | Hypoperfusion in the cerebral cortex                                                                                                                                                                                                                                                                                                                                                                                                                                                                                                                                                                                                                                                                                              | No clear evidence                                                                                                                                                            |
| <b>PET</b><br>1 case series [151]<br>1 case report [176]                                                      | 15 patients   | Hypometabolism in the cerebral cortex and the basal ganglia                                                                                                                                                                                                                                                                                                                                                                                                                                                                                                                                                                                                                                                                       | No clear evidence                                                                                                                                                            |

CT = computed tomography; MRI = magnetic resonance imaging; DWI = diffusion-weighted imaging; FLAIR = fluid attenuated inversion recovery; MRS = magnetic resonance spectroscopy; SPECT = single photon emission computed tomography; PET = positron emission tomography; ADEM = acute disseminated encephalomyelitis; NMDAR = N-methyl-D-aspartate receptor; SREAT = steroid responsive encephalitis with autoimmune thyroiditis

## References

1. Sun QJ, Wang AH, Zhu MJ, et al. [EEG, CT and MRI findings in hepatic encephalopathy]. Nan Fang Yi Ke Da Xue Xue Bao 2007;27(11):1759-1761.
2. Zhu XQ, Chen HJ, Wang Y, et al. Aberrant Resting-State Corticostriatal Functional Connectivity in Cirrhotic Patients with Hyperintense Globus Pallidus on T1-Weighted MR Imaging. PLoS One 2012;7(11):e48886.

3. Pujol A, Pujol J, Graus F, et al. Hyperintense globus pallidus on T1-weighted MRI in cirrhotic patients is associated with severity of liver failure. *Neurology* 1993;43(1):65-69.
4. Krieger S, Jauss M, Jansen O, et al. Neuropsychiatric profile and hyperintense globus pallidus on T1-weighted magnetic resonance images in liver cirrhosis. *Gastroenterology* 1996;111(1):147-155.
5. Burkhard PR, Delavelle J, Du Pasquier R, et al. Chronic parkinsonism associated with cirrhosis: a distinct subset of acquired hepatocerebral degeneration. *Arch Neurol* 2003;60(4):521-528.
6. McKinney AM, Lohman BD, Sarikaya B, et al. Acute hepatic encephalopathy: diffusion-weighted and fluid-attenuated inversion recovery findings, and correlation with plasma ammonia level and clinical outcome. *AJNR Am J Neuroradiol* 2010;31(8):1471-1479.
7. Inoue E, Hori S, Narumi Y, et al. Portal-systemic encephalopathy: presence of basal ganglia lesions with high signal intensity on MR images. *Radiology* 1991;179(2):551-555.
8. Butterworth RF, Spahr L, Fontaine S, et al. Manganese toxicity, dopaminergic dysfunction and hepatic encephalopathy. *Metab Brain Dis* 1995;10(4):259-267.
9. Jog MS, Lang AE. Chronic acquired hepatocerebral degeneration: case reports and new insights. *Mov Disord* 1995;10(6):714-722.
10. Rovira A, Alonso J, Cordoba J. MR imaging findings in hepatic encephalopathy. *AJNR Am J Neuroradiol* 2008;29(9):1612-1621.
11. Bathla G, Hegde AN. MRI and CT appearances in metabolic encephalopathies due to systemic diseases in adults. *Clin Radiol* 2012:epub ahead of print.
12. Sharma P, Eesa M, Scott JN. Toxic and acquired metabolic encephalopathies: MRI appearance. *AJR Am J Roentgenol* 2009;193(3):879-886.
13. Kohira I, Matsuo E, Shiro Y, et al. Hepatic encephalopathy with increased cerebral blood flow in SPECT and MRI abnormalities in the basal ganglia. *Jpn J Psychiatry Neurol* 1994;48(1):33-36.
14. Weissenborn K, Berding G, Kostler H. Altered striatal dopamine D2 receptor density and dopamine transport in a patient with hepatic encephalopathy. *Metab Brain Dis* 2000;15(3):173-178.
15. Nakagawa Y, Matsumura K, Iwasa M, et al. Single photon emission computed tomography and statistical parametric mapping analysis in cirrhotic patients with and without minimal hepatic encephalopathy. *Ann Nucl Med* 2004;18(2):123-129.
16. Cagnin A, Taylor-Robinson SD, Forton DM, et al. In vivo imaging of cerebral "peripheral benzodiazepine binding sites" in patients with hepatic encephalopathy. *Gut* 2006;55(4):547-553.
17. Antunez E, Estruch R, Cardenal C, et al. Usefulness of CT and MR imaging in the diagnosis of acute Wernicke's encephalopathy. *AJR Am J Roentgenol* 1998;171(4):1131-1137.
18. Gallucci M, Bozzao A, Splendiani A, et al. Wernicke encephalopathy: MR findings in five patients. *AJNR Am J Neuroradiol* 1990;11(5):887-892.
19. Mensing JW, Hoogland PH, Slooff JL. Computed tomography in the diagnosis of Wernicke's encephalopathy: a radiological-neuropathological correlation. *Ann Neurol* 1984;16(3):363-365.
20. McDowell JR, LeBlanc HJ. Computed tomographic findings in Wernicke-Korsakoff syndrome. *Arch Neurol* 1984;41(4):453-454.
21. Kitaguchi T, Kobayashi T, Tobimatsu S, et al. Computed tomography and magnetic resonance imaging in a young patient with Wernicke's encephalopathy. *J Neurol* 1987;234(6):449-450.
22. Yokote K, Miyagi K, Kuzuhara S, et al. Wernicke encephalopathy: follow-up study by CT and MR. *J Comput Assist Tomogr* 1991;15(5):835-838.

23. Park SH, Kim M, Na DL, et al. Magnetic resonance reflects the pathological evolution of Wernicke encephalopathy. *J Neuroimaging* 2001;11(4):406-411.
24. Charness ME, DeLaPaz RL. Mamillary body atrophy in Wernicke's encephalopathy: antemortem identification using magnetic resonance imaging. *Ann Neurol* 1987;22(5):595-600.
25. Zuccoli G, Santa Cruz D, Bertolini M, et al. MR imaging findings in 56 patients with Wernicke encephalopathy: nonalcoholics may differ from alcoholics. *AJNR Am J Neuroradiol* 2009;30(1):171-176.
26. Zuccoli G, Gallucci M, Capellades J, et al. Wernicke encephalopathy: MR findings at clinical presentation in twenty-six alcoholic and nonalcoholic patients. *AJNR Am J Neuroradiol* 2007;28(7):1328-1331.
27. Doherty MJ, Watson NF, Uchino K, et al. Diffusion abnormalities in patients with Wernicke encephalopathy. *Neurology* 2002;58(4):655-657.
28. Yamashita M, Yamamoto T. Wernicke encephalopathy with symmetric pericentral involvement: MR findings. *J Comput Assist Tomogr* 1995;19(2):306-308.
29. Bae SJ, Lee HK, Lee JH, et al. Wernicke's encephalopathy: atypical manifestation at MR imaging. *AJNR Am J Neuroradiol* 2001;22(8):1480-1482.
30. Murata T, Fujito T, Kimura H, et al. Serial MRI and (1)H-MRS of Wernicke's encephalopathy: report of a case with remarkable cerebellar lesions on MRI. *Psychiatry Res* 2001;108(1):49-55.
31. Rugilo CA, Uribe Roca MC, Zurru MC, et al. Proton MR spectroscopy in Wernicke encephalopathy. *AJNR Am J Neuroradiol* 2003;24(5):952-955.
32. Celik Y, Kaya M. Brain SPECT findings in Wernicke's encephalopathy. *Neurol Sci* 2004;25(1):23-26.
33. Bartynski WS, Boardman JF. Distinct imaging patterns and lesion distribution in posterior reversible encephalopathy syndrome. *AJNR Am J Neuroradiol* 2007;28(7):1320-1327.
34. Hodnett P, Coyle J, O'Regan K, et al. PRES (posterior reversible encephalopathy syndrome), a rare complication of tacrolimus therapy. *Emerg Radiol* 2009;16(6):493-496.
35. Hedna VS, Stead LG, Bidari S, et al. Posterior reversible encephalopathy syndrome (PRES) and CT perfusion changes. *Int J Emerg Med* 2012;5:12.
36. Covarrubias DJ, Luetmer PH, Campeau NG. Posterior reversible encephalopathy syndrome: prognostic utility of quantitative diffusion-weighted MR images. *AJNR Am J Neuroradiol* 2002;23(6):1038-1048.
37. McKinney AM, Short J, Truwit CL, et al. Posterior reversible encephalopathy syndrome: incidence of atypical regions of involvement and imaging findings. *AJR Am J Roentgenol* 2007;189(4):904-912.
38. Fugate JE, Claassen DO, Cloft HJ, et al. Posterior reversible encephalopathy syndrome: associated clinical and radiologic findings. *Mayo Clin Proc* 2010;85(5):427-432.
39. Sengar AR, Gupta RK, Dhanuka AK, et al. MR imaging, MR angiography, and MR spectroscopy of the brain in eclampsia. *AJNR Am J Neuroradiol* 1997;18(8):1485-1490.
40. Hugonnet E, Da Ines D, Boby H, et al. Posterior reversible encephalopathy syndrome (PRES): Features on CT and MR imaging. *Diagn Interv Imaging* 2012.
41. Russell MT, Nassif AS, Cacayorin ED, et al. Gemcitabine-associated posterior reversible encephalopathy syndrome: MR imaging and MR spectroscopy findings. *Magn Reson Imaging* 2001;19(1):129-132.
42. Lamy C, Oppenheim C, Meder JF, et al. Neuroimaging in posterior reversible encephalopathy syndrome. *J Neuroimaging* 2004;14(2):89-96.
43. Bartynski WS. Posterior reversible encephalopathy syndrome, part 1: fundamental imaging and clinical features. *AJNR Am J Neuroradiol* 2008;29(6):1036-1042.

44. Sutter R, Mengiardi B, Lyrer P, et al. Posterior reversible encephalopathy as the initial manifestation of a Guillain-Barre syndrome. *Neuromuscul Disord* 2009;19(10):709-710.
45. Siddiqui TS, Irfan ul H, Rehman B, et al. Posterior reversible encephalopathy syndrome (PRES). *J Coll Physicians Surg Pak* 2012;22(3):168-170.
46. Eichler FS, Wang P, Wityk RJ, et al. Diffuse metabolic abnormalities in reversible posterior leukoencephalopathy syndrome. *AJNR Am J Neuroradiol* 2002;23(5):833-837.
47. Caldemeyer KS, Smith RR, Harris TM, et al. MRI in acute disseminated encephalomyelitis. *Neuroradiology* 1994;36(3):216-220.
48. Balasubramanya KS, Kovoor JM, Jayakumar PN, et al. Diffusion-weighted imaging and proton MR spectroscopy in the characterization of acute disseminated encephalomyelitis. *Neuroradiology* 2007;49(2):177-183.
49. Campi A, Filippi M, Comi G, et al. Acute transverse myelopathy: spinal and cranial MR study with clinical follow-up. *AJNR Am J Neuroradiol* 1995;16(1):115-123.
50. Fujimoto S, Yamaguchi Y, Gotanda H, et al. [A case of limbic encephalitis with small cell lung carcinoma in which the cognitive function improved and redeteriorated during tumor therapy]. *Nihon Ronen Igakkai Zasshi* 2010;47(1):79-85.
51. Dabbeche C, Guyon D, Loubes-Lacroix F, et al. [Paraneoplastic limbic encephalitis associated with epidermoid lung carcinoma]. *J Neuroradiol* 2005;32(4):278-280.
52. Fischer B, Kalden P, Urban PP, et al. [Paraneoplastic limbic encephalitis in small cell lung carcinoma]. *Pneumologie* 2004;58(5):316-319.
53. Rimmelin A, Sellal F, Morand G, et al. [Imaging of limbic paraneoplastic encephalitis]. *J Radiol* 1997;78(1):73-76.
54. Lacomis D, Khoshbin S, Schick RM. MR imaging of paraneoplastic limbic encephalitis. *J Comput Assist Tomogr* 1990;14(1):115-117.
55. Gultekin SH, Rosenfeld MR, Voltz R, et al. Paraneoplastic limbic encephalitis: neurological symptoms, immunological findings and tumour association in 50 patients. *Brain* 2000;123 ( Pt 7):1481-1494.
56. Lawn ND, Westmoreland BF, Kiely MJ, et al. Clinical, magnetic resonance imaging, and electroencephalographic findings in paraneoplastic limbic encephalitis. *Mayo Clin Proc* 2003;78(11):1363-1368.
57. Said S, Cooper CJ, Reyna E, et al. Paraneoplastic limbic encephalitis, an uncommon presentation of a common cancer: Case report and discussion. *Am J Case Rep* 2013;14:391-394.
58. Maffione AM, Chondrogiannis S, Ferretti A, et al. Correlative imaging with (18)F-FDG PET/CT and MRI in paraneoplastic limbic encephalitis. *Clin Nucl Med* 2013;38(6):463-464.
59. Kawashima S, Okita K, Yamawaki T, et al. [Case of paraneoplastic limbic encephalitis associated with malignant B cell lymphoma]. *Brain Nerve* 2009;61(2):208-212.
60. Launay M, Bozzolo E, Venissac N, et al. [Paraneoplastic limbic encephalitis with positive anti-R1 antibodies and mediastinal seminoma]. *Rev Neurol (Paris)* 2008;164(6-7):612-619.
61. Barnett M, Prosser J, Sutton I, et al. Paraneoplastic brain stem encephalitis in a woman with anti-Ma2 antibody. *J Neurol Neurosurg Psychiatry* 2001;70(2):222-225.
62. Kunze A, Drescher R, Kaiser K, et al. Serial FDG PET/CT in Autoimmune Encephalitis With Faciobrachial Dystonic Seizures. *Clin Nucl Med* 2014.
63. Markakis I, Papathanasiou A, Papageorgiou E, et al. Paraneoplastic limbic encephalitis resembling acute herpetic encephalitis. *Case Rep Neurol Med* 2013;2013:608643.

64. Kuo YL, Tsai HF, Lai MC, et al. Anti-NMDA receptor encephalitis with the initial presentation of psychotic mania. *J Clin Neurosci* 2012;19(6):896-898.
65. Bayreuther C, Bourg V, Dellamonica J, et al. Complex partial status epilepticus revealing anti-NMDA receptor encephalitis. *Epileptic Disord* 2009;11(3):261-265.
66. Sansing LH, Tuzun E, Ko MW, et al. A patient with encephalitis associated with NMDA receptor antibodies. *Nat Clin Pract Neurol* 2007;3(5):291-296.
67. Ryan SA, Kennedy C, Harrington HJ. Steroid-responsive encephalopathy associated with autoimmune thyroiditis presenting as confusion, dysphasia, and myoclonus. *Case Rep Med* 2012;2012:782127.
68. Song L, Liu AH. [Anti-N-methyl-D-aspartic acid receptor encephalitis: clinical analysis of 7 cases]. *Zhonghua Yi Xue Za Zhi* 2013;93(31):2508-2510.
69. Iizuka T, Sakai F, Ide T, et al. Anti-NMDA receptor encephalitis in Japan: long-term outcome without tumor removal. *Neurology* 2008;70(7):504-511.
70. Johnson N, Henry C, Fessler AJ, et al. Anti-NMDA receptor encephalitis causing prolonged nonconvulsive status epilepticus. *Neurology* 2010;75(16):1480-1482.
71. Herrero-Velazquez S, Luis Guerrero-Peral A, Gamez-Leyva G, et al. [Encephalitis due to antibodies against the NMDA receptor. A case report of a female patient with no associated tumour and a literature review]. *Rev Neurol* 2010;50(11):661-666.
72. Ito Y, Abe T, Tomioka R, et al. [Anti-NMDA receptor encephalitis during pregnancy]. *Rinsho Shinkeigaku* 2010;50(2):103-107.
73. Labate A, Irani SR, Vincent A, et al. Anti-NMDA receptor encephalitis: a video case report. *Epileptic Disord* 2009;11(3):267-269.
74. Iizuka T, Hara A. [Anti-NMDA receptor antibody-mediated encephalitis/encephalopathy]. *Rinsho Byori* 2009;57(3):252-261.
75. Henry C, Husson H, de Broucker T. [Autoimmune limbic encephalitis with anti-NMDA receptor antibodies and ovarian teratoma: a treatable form of paraneoplastic limbic encephalitis]. *Rev Neurol (Paris)* 2009;165(1):70-75.
76. Novillo-Lopez ME, Rossi JE, Dalmau J, et al. Treatment-responsive subacute limbic encephalitis and NMDA receptor antibodies in a man. *Neurology* 2008;70(9):728-729.
77. Castillo P, Woodruff B, Caselli R, et al. Steroid-responsive encephalopathy associated with autoimmune thyroiditis. *Arch Neurol* 2006;63(2):197-202.
78. Yoneda M. [Diagnosis and treatments of Hashimoto's encephalopathy]. *Rinsho Shinkeigaku* 2012;52(11):1240-1242.
79. Aupy J, Collongues N, Blanc F, et al. [Autoimmune encephalitis, clinical, radiological and immunological data]. *Rev Neurol (Paris)* 2013;169(2):142-153.
80. Tang Y, Xing Y, Lin MT, et al. Hashimoto's encephalopathy cases: Chinese experience. *BMC Neurol* 2012;12:60.
81. Mahad DJ, Staugaitis S, Ruggieri P, et al. Steroid-responsive encephalopathy associated with autoimmune thyroiditis and primary CNS demyelination. *J Neurol Sci* 2005;228(1):3-5.
82. Su TH, Jin EH, He W. Hashimoto encephalopathy: a case report with proton MR spectroscopic findings. *Chin Med J (Engl)* 2011;124(20):3420-3422.
83. Yamaguchi Y, Wada M, Tanji H, et al. Steroid-responsive thalamic lesions accompanying microbleeds in a case of Hashimoto's encephalopathy with autoantibodies against alpha-enolase. *Intern Med* 2013;52(11):1249-1253.

84. Chang T, Riffsy MT, Gunaratne PS. Hashimoto encephalopathy: clinical and MRI improvement following high-dose corticosteroid therapy. *Neurologist* 2010;16(6):394-396.
85. Chen N, Qin W, Wei C, et al. Time course of Hashimoto's encephalopathy revealed by MRI: report of two cases. *J Neurol Sci* 2011;300(1-2):169-172.
86. Nayak HK, Daga MK, Kumar R, et al. A series report of autoimmune hypothyroidism associated with Hashimoto's encephalopathy: an under diagnosed clinical entity with good prognosis. *BMJ Case Rep* 2010;2010.
87. Aydin-Ozemir Z, Tuzun E, Baykan B, et al. Autoimmune thyroid encephalopathy presenting with epilepsia partialis continua. *Clin EEG Neurosci* 2006;37(3):204-209.
88. Zhao W, Li J, Wang J, et al. A case of Hashimoto encephalopathy: clinical manifestation, imaging, pathology, treatment, and prognosis. *Neurologist* 2011;17(3):141-143.
89. Hsu CS, Wu YC, Lu MK, et al. 99mTc ECD and 99mTc TRODAT-1 SPECT in Hashimoto encephalopathy. *Clin Nucl Med* 2012;37(4):e86-88.
90. Fuertes J, Garcia-Burillo A, Castell-Conesa J, et al. Functional neuroimaging in Hashimoto's encephalitis: a physiopathological imaging? *Eur J Nucl Med Mol Imaging* 2009;36(4):726.
91. Llorens V, Gabilondo I, Gomez-Esteban JC, et al. Abnormal multifocal cerebral blood flow on Tc-99m HMPAO SPECT in a patient with anti-NMDA-receptor encephalitis. *J Neurol* 2010;257(9):1568-1569.
92. De Holanda NC, de Lima DD, Cavalcanti TB, et al. Hashimoto's encephalopathy: systematic review of the literature and an additional case. *J Neuropsychiatry Clin Neurosci* 2011;23(4):384-390.
93. Riancho J, Delgado-Alvarado M, Sedano MJ, et al. Herpes simplex encephalitis: clinical presentation, neurological sequelae and new prognostic factors. Ten years of experience. *Neurol Sci* 2013;34(10):1879-1881.
94. Taira N, Kamei S, Morita A, et al. Predictors of a prolonged clinical course in adult patients with herpes simplex virus encephalitis. *Intern Med* 2009;48(2):89-94.
95. Mekan SF, Wasay M, Khelaeni B, et al. Herpes simplex encephalitis: analysis of 68 cases from a tertiary care hospital in Karachi, Pakistan. *J Pak Med Assoc* 2005;55(4):146-148.
96. Hasegawa Y, Morishita M, Ikeda T, et al. Early diagnosis of herpes simplex virus encephalitis by single photon emission computed tomography (SPECT) in patients with normal MRI. *Rinsho Shinkeigaku* 1996;36(3):475-480.
97. Zajkowska JM, Ustymowicz A, Hermanowska-Szpakowicz T. [Difficulties in early diagnosis of Herpes simplex encephalitis]. *Pol Merkur Lekarski* 2005;19(113):719-722.
98. Jablkowski M, Kolasa P, Szubert W, et al. Herpes simplex encephalitis: a case report. *Med Sci Monit* 2004;10(8):CS41-45.
99. Sili U, Kaya A, Mert A, et al. Herpes simplex virus encephalitis: Clinical manifestations, diagnosis and outcome in 106 adult patients. *J Clin Virol* 2014.
100. Sheybani F, Arabikhan HR, Naderi HR. Herpes Simplex Encephalitis (HSE) and its outcome in the Patients who were Admitted to a Tertiary Care Hospital in Mashhad, Iran, over a 10-year Period. *J Clin Diagn Res* 2013;7(8):1626-1628.
101. Sawlani V. Diffusion-weighted imaging and apparent diffusion coefficient evaluation of herpes simplex encephalitis and Japanese encephalitis. *J Neurol Sci* 2009;287(1-2):221-226.
102. Riera-Mestre A, Gubieras L, Martinez-Yelamos S, et al. Adult herpes simplex encephalitis: fifteen years' experience. *Enferm Infecc Microbiol Clin* 2009;27(3):143-147.



103. Hatipoglu HG, Sakman B, Yuksel E. Magnetic resonance and diffusion-weighted imaging findings of herpes simplex encephalitis. *Herpes* 2008;15(1):13-17.
104. Kuker W, Nagele T, Schmidt F, et al. Diffusion-weighted MRI in herpes simplex encephalitis: a report of three cases. *Neuroradiology* 2004;46(2):122-125.
105. Sener RN. Herpes simplex encephalitis: diffusion MR imaging findings. *Comput Med Imaging Graph* 2001;25(5):391-397.
106. Diamond EL, Hatzoglou V, Santomaso B, et al. Temporal lobe meningioma with ipsilateral herpes simplex encephalitis. *Neurohospitalist* 2014;4(1):42-43.
107. Ahmed R, Kiani IG, Shah F, et al. Herpes simplex encephalitis presenting with normal CSF analysis. *J Coll Physicians Surg Pak* 2013;23(10):815-817.
108. Navin P, Delanty N, Brennan P, et al. Herpes simplex virus encephalitis involving the right thalamus. *BMJ Case Rep* 2013;2013.
109. Rigamonti A, Lauria G, Mantero V, et al. A case of late herpes simplex encephalitis relapse. *J Clin Virol* 2013;58(1):269-270.
110. Shaikh AG, Termsarasab P, Riley DE, et al. The floccular syndrome in herpes simplex type 1 encephalitis. *J Neurol Sci* 2013;325(1-2):154-155.
111. Tandon AS. Choreoathetosis in herpes simplex encephalitis relapse with bilateral thalamic gliotic lesions on magnetic resonance imaging. *Neurol India* 2012;60(5):526-527.
112. Sokolov AA, Reincke M. Herpes simplex encephalitis affecting the entire limbic system. *Mayo Clin Proc* 2012;87(9):e69.
113. Kim SJ, Kang SW, Joo EY. An unusual case of herpes simplex viral encephalitis following acute retinal necrosis after administration of a systemic steroid. *J Epilepsy Res* 2012;2(1):21-24.
114. Adler AC, Kadimi S, Apaloo C, et al. Herpes simplex encephalitis with two false-negative cerebrospinal fluid PCR tests and review of negative PCR results in the clinical setting. *Case Rep Neurol* 2011;3(2):172-178.
115. Raper DM, Wong A, McCormick PC, et al. Herpes simplex encephalitis following spinal ependymoma resection: case report and literature review. *J Neurooncol* 2011;103(3):771-776.
116. Yochim BP, Kane KD, Horning S, et al. Malingering or expected deficits? A case of herpes simplex encephalitis. *Neurocase* 2010;16(5):451-460.
117. Yen CF, Patel MS, Chu P, et al. Case report: herpes simplex encephalitis in cancer patients. *Biosci Trends* 2009;3(1):38-40.
118. Markoula S, Giannopoulos S, Pelidou SH, et al. MRI deterioration in herpes simplex encephalitis despite clinical recovery. *Neurologist* 2009;15(4):223-226.
119. Sellner J, Buonomano R, Nedeltchev K, et al. A case of maternal herpes simplex virus encephalitis during late pregnancy. *Nat Clin Pract Neurol* 2009;5(1):51-56.
120. Akyldz BN, Gumus H, Kumandas S, et al. Diffusion-weighted magnetic resonance is better than polymerase chain reaction for early diagnosis of herpes simplex encephalitis: a case report. *Pediatr Emerg Care* 2008;24(6):377-379.
121. Sobolewski P, Sledzinska M, Hatalska-Zerebiec R, et al. [Favourable course of herpes simplex encephalitis in the 37-year-old woman in 26th weeks of pregnancy]. *Przeegl Epidemiol* 2008;62 Suppl 1:109-111.

122. Gumus H, Kumandas S, Per H, et al. Unusual presentation of herpes simplex virus encephalitis: bilateral thalamic involvement and normal imaging of early stage of the disease. *Am J Emerg Med* 2007;25(1):87-89.
123. Kubota T, Ito M, Maruyama K, et al. Serial diffusion-weighted imaging of neonatal herpes encephalitis: a case report. *Brain Dev* 2007;29(3):171-173.
124. Hirai R, Ayabe M, Shoji H, et al. Herpes simplex encephalitis presenting with bilateral hippocampal lesions on magnetic resonance imaging, simultaneously complicated by small cell lung carcinoma. *Intern Med* 2005;44(9):1006-1008.
125. Heiner L, Demaerel P. Diffusion-weighted MR imaging findings in a patient with herpes simplex encephalitis. *Eur J Radiol* 2003;45(3):195-198.
126. Allmendinger AM, Spektor V, Destian S. CT and MR imaging of Susac syndrome in a young male presenting with acute disorientation. *Clin Imaging* 2010;34(2):138-142.
127. White ML, Zhang Y, Smoker WR. Evolution of lesions in Susac syndrome at serial MR imaging with diffusion-weighted imaging and apparent diffusion coefficient values. *AJNR Am J Neuroradiol* 2004;25(5):706-713.
128. Snyers B, Boschi A, De Potter P, et al. Susac syndrome in four male patients. *Retina* 2006;26(9):1049-1055.
129. Maillart E, Deschamps R, Moulignier A, et al. [Susac syndrome: study of five cases]. *Rev Neurol (Paris)* 2009;165(6-7):575-582.
130. Mateen FJ, Zubkov AY, Muralidharan R, et al. Susac syndrome: clinical characteristics and treatment in 29 new cases. *Eur J Neurol* 2012;19(6):800-811.
131. Xu MS, Tan CB, Umapathi T, et al. Susac syndrome: serial diffusion-weighted MR imaging. *Magn Reson Imaging* 2004;22(9):1295-1298.
132. Chawla A, Sathasivam S, Nayar R, et al. Susac syndrome in a patient with hepatitis C. *J Neuroophthalmol* 2007;27(1):55-56.
133. Le Moigne F, Lamboley JL, Vitry T, et al. [Susac syndrome, retinocochleocerebral microangiopathy: contribution of MRI]. *J Neuroradiol* 2009;36(5):285-289.
134. Joe SG, Kim JG, Kwon SU, et al. Recurrent bilateral branch retinal artery occlusion with hearing loss and encephalopathy: the first case report of Susac syndrome in Korea. *J Korean Med Sci* 2011;26(11):1518-1521.
135. Robles-Cedeno R, Ramio-Torrenta L, Laguillo G, et al. Long-term clinical and radiological evolution in one case of Susac's syndrome. *Neurol Sci* 2012;33(6):1407-1410.
136. Randakeviciene G, Gleizniene R, Nylander R. Susac's Syndrome: A Case Presentation and Radiological Approach to this Rare Autoimmune Endotheliopathy. *Medicina (Kaunas)* 2013;49(1):15-17.
137. Allmendinger AM, Viswanadhan N, Klufas RA, et al. Diffuse cauda equina enhancement in a middle aged male with Susac syndrome and symptomatic cauda equina syndrome. *J Neurol Sci* 2013;333(1-2):25-28.
138. Cho HJ, Kim CG, Cho SW, et al. A case of Susac syndrome. *Korean J Ophthalmol* 2013;27(5):381-383.
139. Allmendinger AM, Mallery RM, Magro CM, et al. Cauda equina involvement in Susac's syndrome. *J Neurol Sci* 2014;337(1-2):91-96.
140. Antulov R, Holjar Erlic I, Perkovic O, et al. Susac's syndrome during pregnancy - the first Croatian case. *J Neurol Sci* 2014;341(1-2):162-164.

141. Hua le H, Donlon SL, Okuda DT. A case of Susac syndrome with cervical spinal cord involvement on MRI. *J Neurol Sci* 2014;337(1-2):228-231.
142. Dielman C, Laureys G, Meurs A, et al. Susac syndrome: a case report and PET imaging findings. *Acta Neurol Belg* 2009;109(3):226-230.
143. Hayashi R, Hanyu N, Kuwabara T, et al. Serial computed tomographic and electroencephalographic studies in Creutzfeldt-Jakob disease. *Acta Neurol Scand* 1992;85(3):161-165.
144. Garcia Santos JM, Lopez Corbalan JA, Martinez-Lage JF, et al. CT and MRI in iatrogenic and sporadic Creutzfeldt-Jakob disease: as far as imaging perceives. *Neuroradiology* 1996;38(3):226-231.
145. Kovanen J, Erkinjuntti T, Iivanainen M, et al. Cerebral MR and CT imaging in Creutzfeldt-Jakob disease. *J Comput Assist Tomogr* 1985;9(1):125-128.
146. Schroter A, Zerr I, Henkel K, et al. Magnetic resonance imaging in the clinical diagnosis of Creutzfeldt-Jakob disease. *Arch Neurol* 2000;57(12):1751-1757.
147. Shiga Y, Miyazawa K, Sato S, et al. Diffusion-weighted MRI abnormalities as an early diagnostic marker for Creutzfeldt-Jakob disease. *Neurology* 2004;63(3):443-449.
148. Vitali P, Maccagnano E, Caverzasi E, et al. Diffusion-weighted MRI hyperintensity patterns differentiate CJD from other rapid dementias. *Neurology* 2011;76(20):1711-1719.
149. Collins SJ, Sanchez-Juan P, Masters CL, et al. Determinants of diagnostic investigation sensitivities across the clinical spectrum of sporadic Creutzfeldt-Jakob disease. *Brain* 2006;129(Pt 9):2278-2287.
150. Collie DA, Summers DM, Sellar RJ, et al. Diagnosing variant Creutzfeldt-Jakob disease with the pulvinar sign: MR imaging findings in 86 neuropathologically confirmed cases. *AJNR Am J Neuroradiol* 2003;24(8):1560-1569.
151. Xing XW, Zhang JT, Zhu F, et al. Comparison of diffusion-weighted MRI with 18F-fluorodeoxyglucose-positron emission tomography/CT and electroencephalography in sporadic Creutzfeldt-Jakob disease. *J Clin Neurosci* 2012;19(10):1354-1357.
152. Fujita K, Harada M, Sasaki M, et al. Multicentre multiobserver study of diffusion-weighted and fluid-attenuated inversion recovery MRI for the diagnosis of sporadic Creutzfeldt-Jakob disease: a reliability and agreement study. *BMJ Open* 2012;2(1):e000649.
153. Meissner B, Kallenberg K, Sanchez-Juan P, et al. MRI lesion profiles in sporadic Creutzfeldt-Jakob disease. *Neurology* 2009;72(23):1994-2001.
154. Manners DN, Parchi P, Tonon C, et al. Pathologic correlates of diffusion MRI changes in Creutzfeldt-Jakob disease. *Neurology* 2009;72(16):1425-1431.
155. Yi SH, Park KC, Yoon SS, et al. Relationship between clinical course and Diffusion-weighted MRI findings in sporadic Creutzfeldt-Jakob Disease. *Neurol Sci* 2008;29(4):251-255.
156. Krasnianski A, Kallenberg K, Collie DA, et al. MRI in the classical MM1 and the atypical MV2 subtypes of sporadic CJD: an inter-observer agreement study. *Eur J Neurol* 2008;15(8):762-771.
157. Satoh K, Shirabe S, Tsujino A, et al. Total tau protein in cerebrospinal fluid and diffusion-weighted MRI as an early diagnostic marker for Creutzfeldt-Jakob disease. *Dement Geriatr Cogn Disord* 2007;24(3):207-212.
158. Tschampa HJ, Kallenberg K, Urbach H, et al. MRI in the diagnosis of sporadic Creutzfeldt-Jakob disease: a study on inter-observer agreement. *Brain* 2005;128(Pt 9):2026-2033.
159. Nougaret S, Brunel H, Bourbotte G, et al. [Diffusion-weighted MRI in sporadic Creutzfeldt-Jakob disease]. *J Neuroradiol* 2007;34(4):260-266.

160. Cambier DM, Kantarci K, Worrell GA, et al. Lateralized and focal clinical, EEG, and FLAIR MRI abnormalities in Creutzfeldt-Jakob disease. *Clin Neurophysiol* 2003;114(9):1724-1728.
161. Uemura A, O'Uchi T, Sakamoto T, et al. High signal of the striatum in sporadic Creutzfeldt-Jakob disease: sequential change on T2-weighted MRI. *Neuroradiology* 2002;44(4):314-318.
162. Urbach H, Paus S, Tschampa HJ, et al. [Creutzfeldt-Jakob disease: value of MRI]. *Rofo* 2001;173(6):509-514.
163. Nitrini R, Mendonca RA, Huang N, et al. Diffusion-weighted MRI in two cases of familial Creutzfeldt--Jakob disease. *J Neurol Sci* 2001;184(2):163-167.
164. Coulthard A, Hall K, English PT, et al. Quantitative analysis of MRI signal intensity in new variant Creutzfeldt-Jakob disease. *Br J Radiol* 1999;72(860):742-748.
165. Urbach H, Klisch J, Wolf HK, et al. MRI in sporadic Creutzfeldt-Jakob disease: correlation with clinical and neuropathological data. *Neuroradiology* 1998;40(2):65-70.
166. Liou HH, Chiu HC, Liu HM. Abnormal enhancement of the left putamen on brain MRI in a case of proven Creutzfeldt-Jakob disease. *Eur Neurol* 1996;36(2):107-108.
167. Tartaro A, Fulgente T, Delli Pizzi C, et al. MRI alterations as an early finding in Creutzfeld-Jakob disease. *Eur J Radiol* 1993;17(3):155-158.
168. Onofrj M, Fulgente T, Gambi D, et al. Early MRI findings in Creutzfeldt-Jakob disease. *J Neurol* 1993;240(7):423-426.
169. Di Rocco A, Molinari S, Stollman AL, et al. MRI abnormalities in Creutzfeldt-Jakob disease. *Neuroradiology* 1993;35(8):584-585.
170. Katsube M, Shiota Y, Harada T, et al. [A case of MM1+2 Creutzfeldt-Jakob disease with a longitudinal study of EEG and MRI]. *Rinsho Byori* 2013;61(11):995-1000.
171. Moisset X, Vitello N, Cornut-Chauvinc C, et al. [Unilateral Creutzfeld-Jakob disease: report of a probable case on electroclinical, MRI and biological criteria]. *Rev Neurol (Paris)* 2013;169(2):162-165.
172. Kono S, Manabe Y, Fujii D, et al. Serial diffusion-weighted MRI and SPECT findings in a Creutzfeldt-Jakob disease patient with V180I mutation. *J Neurol Sci* 2011;301(1-2):100-103.
173. Yung B, Moeller JJ, Bitar M, et al. Teaching NeuroImages: hemispheric-onset Creutzfeldt-Jakob disease with concordant MRI and EEG findings. *Neurology* 2010;75(16):e66.
174. Mourand I, Grandiere-Perez L, Joyes B, et al. Lateralized clinical and diffusion-weighted MRI abnormalities in a probable case of sporadic Creutzfeldt-Jakob disease. *Acta Neurol Belg* 2010;110(2):193-195.
175. Tian HJ, Zhang JT, Lang SY, et al. MRI sequence findings in sporadic Creutzfeldt-Jakob disease. *J Clin Neurosci* 2010;17(11):1378-1380.
176. Prasad S, Lee EB, Woo JH, et al. Photo essay. MRI and positron emission tomography findings in Heidenhain variant Creutzfeldt-Jakob disease. *J Neuroophthalmol* 2010;30(3):260-262.
177. Satoh K, Nakaoke R, Nishiura Y, et al. Early detection of sporadic CJD by diffusion-weighted MRI before the onset of symptoms. *J Neurol Neurosurg Psychiatry* 2011;82(8):942-943.
178. Geschwind MD, Potter CA, Sattavat M, et al. Correlating DWI MRI with pathologic and other features of Jakob-Creutzfeldt disease. *Alzheimer Dis Assoc Disord* 2009;23(1):82-87.
179. Praveen KS, Sinha S, Chandrasekhar HS, et al. Sporadic onset Creutzfeldt-Jacob disease: interesting MRI observations. *Neurol India* 2006;54(4):418-420.
180. Nitrini R, Areza-Fegyveres R, Martins VR, et al. [Asymmetric cortical high signal on diffusion weighted-MRI in a case of Creutzfeldt-Jakob disease]. *Arq Neuropsiquiatr* 2005;63(2B):519-522.

181. Pauri F, Amabile G, Fattapposta F, et al. Sporadic Creutzfeldt-Jakob disease without dementia at onset: clinical features, laboratory tests and sequential diffusion MRI (in an autopsy-proven case). *Neurol Sci* 2004;25(4):234-237.
182. Donahue JE, Hanna PA, Hariharan S. Autopsy-proven Creutzfeldt-Jakob disease in a patient with a negative 14-3-3 assay and nonspecific EEG and MRI. *Neurol Sci* 2004;24(6):411-413.
183. Bocquet P, De Stampa M, Foucher C, et al. [Sporadic Creutzfeldt-Jakob disease and isolated dementia. Contribution of brain MRI]. *Ann Med Interne (Paris)* 2002;153(1):62-67.
184. Tribl GG, Strasser G, Zeithofer J, et al. Sequential MRI in a case of Creutzfeldt-Jakob disease. *Neuroradiology* 2002;44(3):223-226.
185. Konagaya M, Sakai M, Asakura K, et al. [T2-weighted MRI and pathological findings in the cerebral hemisphere of panencephalitic Creutzfeldt-Jakob disease]. *No To Shinkei* 2001;53(4):398-399.
186. Matoba M, Tonami H, Miyaji H, et al. Creutzfeldt-Jakob disease: serial changes on diffusion-weighted MRI. *J Comput Assist Tomogr* 2001;25(2):274-277.
187. Oppenheim C, Brandel JP, Hauw JJ, et al. MRI and the second French case of vCJD. *Lancet* 2000;356(9225):253-254.
188. Vrancken AF, Frijns CJ, Ramos LM. FLAIR MRI in sporadic Creutzfeldt-Jakob disease. *Neurology* 2000;55(1):147-148.
189. Saito T, Isozumi K, Komatsumoto S, et al. [A case of codon 232 mutation-induced Creutzfeldt-Jakob disease visualized by the MRI-FLAIR images with atypical clinical symptoms]. *Rinsho Shinkeigaku* 2000;40(1):51-54.
190. Samman I, Schulz-Schaeffer WJ, Wohrle JC, et al. Clinical range and MRI in Creutzfeldt-Jakob disease with heterozygosity at codon 129 and prion protein type 2. *J Neurol Neurosurg Psychiatry* 1999;67(5):678-681.
191. Nagaoka U, Kurita K, Hosoya T, et al. [Diffusion images on brain MRI in Creutzfeldt-Jakob disease]. *Rinsho Shinkeigaku* 1999;39(4):468-470.
192. Hirose Y, Mokuno K, Abe Y, et al. [A case of clinically diagnosed Creutzfeldt-Jakob disease with serial MRI diffusion weighted images]. *Rinsho Shinkeigaku* 1998;38(8):779-782.
193. Satoh A, Goto H, Satoh H, et al. A case of Creutzfeldt-Jakob disease with a point mutation at codon 232: correlation of MRI and neurologic findings. *Neurology* 1997;49(5):1469-1470.
194. Kobayashi S, Ohuchi T, Maki T. [A case of probable Creutzfeldt-Jakob disease with a point mutation of prion protein gene codon 180 and atypical MRI findings]. *Rinsho Shinkeigaku* 1997;37(8):671-674.
195. Ishida S, Sugino M, Koizumi N, et al. Serial MRI in early Creutzfeldt-Jacob disease with a point mutation of prion protein at codon 180. *Neuroradiology* 1995;37(7):531-534.
196. Yoon SS, Chan S, Chin S, et al. MRI of Creutzfeldt-Jakob disease: asymmetric high signal intensity of the basal ganglia. *Neurology* 1995;45(10):1932-1933.
197. Gertz HJ, Henkes H, Cervos-Navarro J. Creutzfeldt-Jakob disease: correlation of MRI and neuropathologic findings. *Neurology* 1988;38(9):1481-1482.
198. Sarac H, Hajnsek S, Basic S, et al. Magnetic resonance spectroscopy and measurement of tau epitopes of autopsy proven sporadic Creutzfeldt-Jakob disease in a patient with non-specific initial EEG, MRI and negative 14-3-3 immunoblot. *Coll Antropol* 2008;32 Suppl 1:199-204.
